## **An mRNA SARS-CoV-2 vaccine employing a novel delivery vehicle with a TLR-9 agonist induces neutralizing antibodies and T cell memory**

Ole A.W. Haabeth<sup>a\*</sup>, Julian J.K. Lohmeyer<sup>a\*</sup>, Adrienne Sallets<sup>a\*</sup>, Tim R. Blake<sup>a,b</sup>, Idit Sagiv-Barfi<sup>a</sup>, Debra K. Czerwinski<sup>a</sup>, Abigail E. Powell<sup>c</sup>, Paul A. Wender<sup>b,d</sup>, Robert M. Waymouth<sup>b</sup>, Ronald Levy<sup>a‡</sup>

<sup>a</sup>Stanford Cancer Institute, Division of Oncology, Department of Medicine, Stanford University, Stanford, CA 94305;

<sup>b</sup>Department of Chemistry, Stanford University, Stanford, CA 94305;

<sup>c</sup>Department of Biochemistry & Stanford ChEM-H, Stanford University, Stanford CA 94305;

<sup>d</sup>Department of Chemical and Systems Biology, Stanford University, Stanford, CA 94305

\*These authors contributed equally to this work

‡ Corresponding author; email [levy@stanford.edu](mailto:levy@stanford.edu)

### **Abstract**

The SARS-CoV-2 pandemic has necessitated the rapid development of prophylactic vaccines. Two mRNA vaccines have been approved for emergency use by the FDA and have demonstrated extraordinary effectiveness. The success of these mRNA vaccines establishes the speed of development and therapeutic potential of mRNA. These authorized vaccines encode full-length versions of the SARS-CoV-2 spike protein. They are formulated with Lipid Nanoparticle (LNP) delivery vehicles that have inherent immunostimulatory properties. Different vaccination strategies and alternative mRNA delivery vehicles would be desirable to ensure flexibility of future generations of SARS-CoV-2 vaccines and the development of mRNA vaccines in general. Here, we report on the development of an alternative mRNA vaccine approach using a novel delivery vehicle called Charge-Altering Releasable Transporters (CARTs). Using these inherently nonimmunogenic vehicles we are able to tailor the vaccine immunogenicity by inclusion of co-formulated adjuvants such as oligonucleotides with CpG motifs. Mice vaccinated with our mRNA-CART vaccine developed therapeutically relevant levels of RBD-specific neutralizing antibodies in both the circulation and in the lung bronchial fluids. In addition, our vaccine elicited strong and long lasting RBD-specific T<sub>H</sub>1 T cell responses including CD4<sup>+</sup> and CD8<sup>+</sup> T cell memory.

### **Introduction**

Coronavirus pandemics have been a growing concern for more than a decade and several attempts have been made to develop vaccines against SARS-CoV-1 and the Middle Eastern Respiratory Syndrome (MERS).<sup>1</sup> The global spread of the SARS-CoV-2 virus stimulated worldwide efforts to leverage previous insights from coronavirus vaccines to develop safe, effective and scalable vaccines to alleviate the COVID-19 pandemic. While a variety of vaccine candidates and approaches are being investigated worldwide,<sup>2</sup> the extraordinary pace of development and implementation of mRNA vaccines<sup>3-6</sup> illustrates the potential of this emerging technology. The mRNA vaccines granted emergency use authorization by the FDA against SARS-Cov-2 represents a triumph of basic and applied science as these advances enabled the most rapid clinical translation from concept to clinical trial ever for a vaccine.<sup>5,6</sup> mRNA is transiently expressed, does not integrate into the genome and is eliminated through

natural degradation mechanisms in the body. mRNA vaccines offer flexible and fast design, that will allow for subsequent generations of products to address the emergence of new virus variants.

The currently approved mRNA vaccines<sup>5,6</sup> generated by in vitro transcription use chemically-modified nucleotides incorporated in mRNAs encoding the full viral spike protein, usually containing 2 structural epitope mutations, formulated in lipid nanoparticles (LNPs) and are administered intramuscularly. Despite their extraordinary success, the underlying science that contributes to the most effective, safe and scalable vaccine against COVID-19 continues to evolve. Modifications and sequence optimization of the mRNA and the particular components of the delivery vehicle can influence the immunological response.<sup>7</sup> Previous studies of SARS-CoV and MERS have shown that the proper choice of encoded antigen is critical<sup>8</sup> to avoid potential complications from antibody dependent enhancement (ADE) of disease.<sup>9</sup> The chemistry of the delivery vehicle is also important as the ionizable lipids that are a component of LNPs act as adjuvants but can induce adverse events<sup>10</sup> and the use of polyethylene glycol (PEG) in the LNP formulations can contribute to allergic reactions.<sup>11,12</sup>

These continuing challenges and the degree to which the global scale of the COVID-19 pandemic has strained supply chains for the existing LNP technologies highlight the need to develop alternative approaches, both to enhance the resilience of the global response in the face of this and future pandemics, as well as to test alternative approaches that might lead to the most effective and durable immunological responses as well as to be able respond rapidly to emerging new virus variants<sup>13</sup>.

In this study we present an alternative 3-component mRNA vaccine utilizing mRNA encoding the receptor binding domain (RBD) of the SARS-CoV-2 spike protein formulated with a highly efficient, non-toxic, PEG-free mRNA delivery platform called Charge-Altering Releasable Transporters (CARTs)<sup>14-16</sup> and a TLR9 agonist (CpG) as co-formulated adjuvant<sup>16,17</sup> (Fig. 1A). Prior studies had indicated that the RBD is a promising antigen target<sup>18-20</sup> as antibodies elicited against this target are often strongly neutralizing. CARTs offer a promising new gene delivery platform and have proven to be effective deliverers of mRNA vaccines in preclinical mouse studies.<sup>16,21</sup> CARTs are single component amphiphilic diblock oligomers containing a sequence of lipid monomers and a sequence of cationic monomers (Fig. 1B, supplemental Fig. 1). They are readily produced on scale in a two-step organocatalytic oligomerization. CARTs electrostatically encapsulate mRNA (or other co-formulated nucleotides like CpG) and deliver the genetic cargo into cells. A unique feature of CARTs is their ability to undergo a charge-altering rearrangement to produce neutral diketopiperazine small molecules (DKPs). This transformation facilitates the release of mRNA (Fig. 1C) and eliminates any toxic issues associated with persistent cations.<sup>22</sup> Previous observations had shown that upon I.V. injection, CARTs containing hydroxyethyl glycine repeating cation units selectively deliver mRNA to the spleen,<sup>14-16</sup> whereas intramuscular (IM) injections of these same products result in mRNA translation locally in the muscle (Fig. 1D). Moreover, CARTs containing unsaturated lipid blocks exhibit enhanced transfection of antigen presenting cells<sup>15</sup> motivating our choice of such a CART for the COVID-19 vaccine. The CART delivery vehicle does not induce nonspecific immune stimulation by itself.<sup>16,21</sup> This property allows the co-formulation of appropriate adjuvants to tune the induced immune response.

Here we show that co-formulation of a CART with mRNA encoding the SARS-CoV-2 RBD with the TLR9 agonist CpG (RBD mRNA + CpG-CART) induces robust neutralizing antibodies and RBD-specific T cell responses in mice. Moreover, we detect significant levels of these antibodies and memory T cells in the spleen and lung of vaccinated animals.

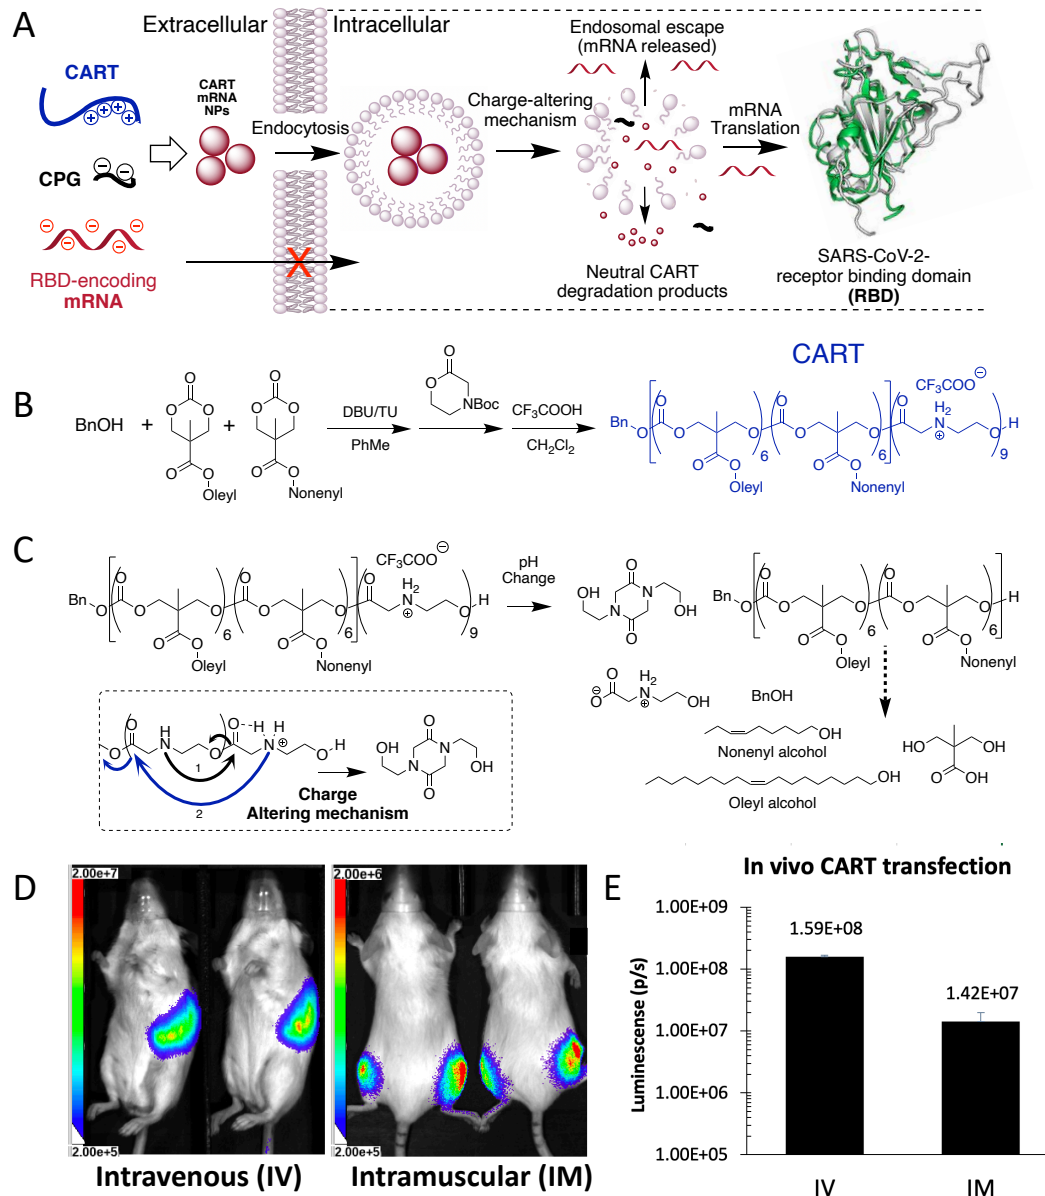

**Figure 1) CART delivery platform methodology effectively complexes, delivers and releases mRNA via both systemic and local administration (A) CART electrostatic formulation, cellular uptake, endosomal escape, and translation of SARS-CoV-2 RBD mRNA (B) CART synthesis via ring-opening polymerization (DBU=1,8-Diazabicyclo[5.4.0]undec-7-ene, TU=1-(3,5-bis(trifluoromethyl)phenyl)-3-cyclohexylthiourea) (C) CART chemical structure, degradation products, and charge-altering mechanism (D) In vivo luciferase reporter gene expression via systemic i.v. administration (left, 5 $\mu$ g fLuc mRNA), and local i.m. administration (2.5 $\mu$ g fLuc mRNA each flank) (E) quantification of in vivo mRNA expression at 4 hours post administration**

## Results

### **RBD mRNA + CpG-CART vaccination elicits anti-RBD specific antibodies at day 4 after immunization**

An mRNA encoding the Receptor Binding Domain (RBD)<sup>23</sup> of SARS-CoV-2 was made in-house based on the published sequence of the virus and included a 6x histidine (His) tag. The resulting mRNA contained the optimal CAP-1 structure, uridines were replaced with modified N1-methyl-pseudouridine and cytidines were replaced with 5-methylcytidine in order to maximize mRNA stability and translation. Protein expression was verified by Western Blot in transfected 293F and Hela cells (Supplemental Fig. 2A). To demonstrate that administration of mRNA-CART complexes does not lead to nonspecific immune stimulatory effects when formulated with optimally modified mRNA<sup>24</sup>, mice were injected intravenously (IV) with mRNA-CART and monitored for the activation of innate immune cells, a test that we have found to be most sensitive. Our mRNA CART complexes were free of such nonspecific stimulatory effects when formulated with modified mRNA. However, when formulated with unmodified mRNA, nonspecific activation of innate immune cell subsets could be observed, demonstrating that the property of nonspecific immune stimulation is dependent on the cargo and not the CARTs (Supp. Fig. 2B). We were then able to direct the immune response of our candidate vaccine by co-formulating the mRNA-CART complexes with CpG oligonucleotides that trigger endosomal TLR9 receptors in antigen presenting cells. These CpG entities are known to be safe and effective vaccine adjuvants.<sup>17</sup>

We assessed the effects of the RBD mRNA-CART vaccination with or without the addition of CpG as adjuvant. IV injection of CARTs effectively delivers the cargo to antigen presenting cells (APCs) such as B cells, macrophages and dendritic cells in the spleen<sup>15,16</sup> (Fig. 1D). This route of administration of mRNA-CART vaccination had proven effective in previous studies of therapeutic cancer vaccination.<sup>16</sup> Based on this knowledge, we evaluated our vaccine first by IV administration. Mice were primed on day 0 and received two boosts on day 4 and on day 8 with 3ug RBD mRNA-CART formulated with or without 3ug of CpG (Fig. 2A). As control a group that received 3ug CpG-CART alone with no mRNA and a control group treated with Phosphate Buffered Saline (PBS) were included. Mice vaccinated with RBD mRNA-CART plus CpG developed detectable levels of anti-RBD IgG and IgM as early as 4 days after vaccination (supplementary Fig. 3A). Over time, we observed an increase in the levels of anti-RBD antibodies in the serum of both mRNA-treated groups compared to controls (Fig. 2B). Importantly, the antibodies induced by our vaccine were specific for RBD and did not cross react to an irrelevant His-tagged protein (GFP-His) (supplementary Fig. 3B). Notably, RBD-specific antibody responses in mice vaccinated with the formulation including CpG consistently exceeded those observed in groups treated without CpG (Fig. 2B).

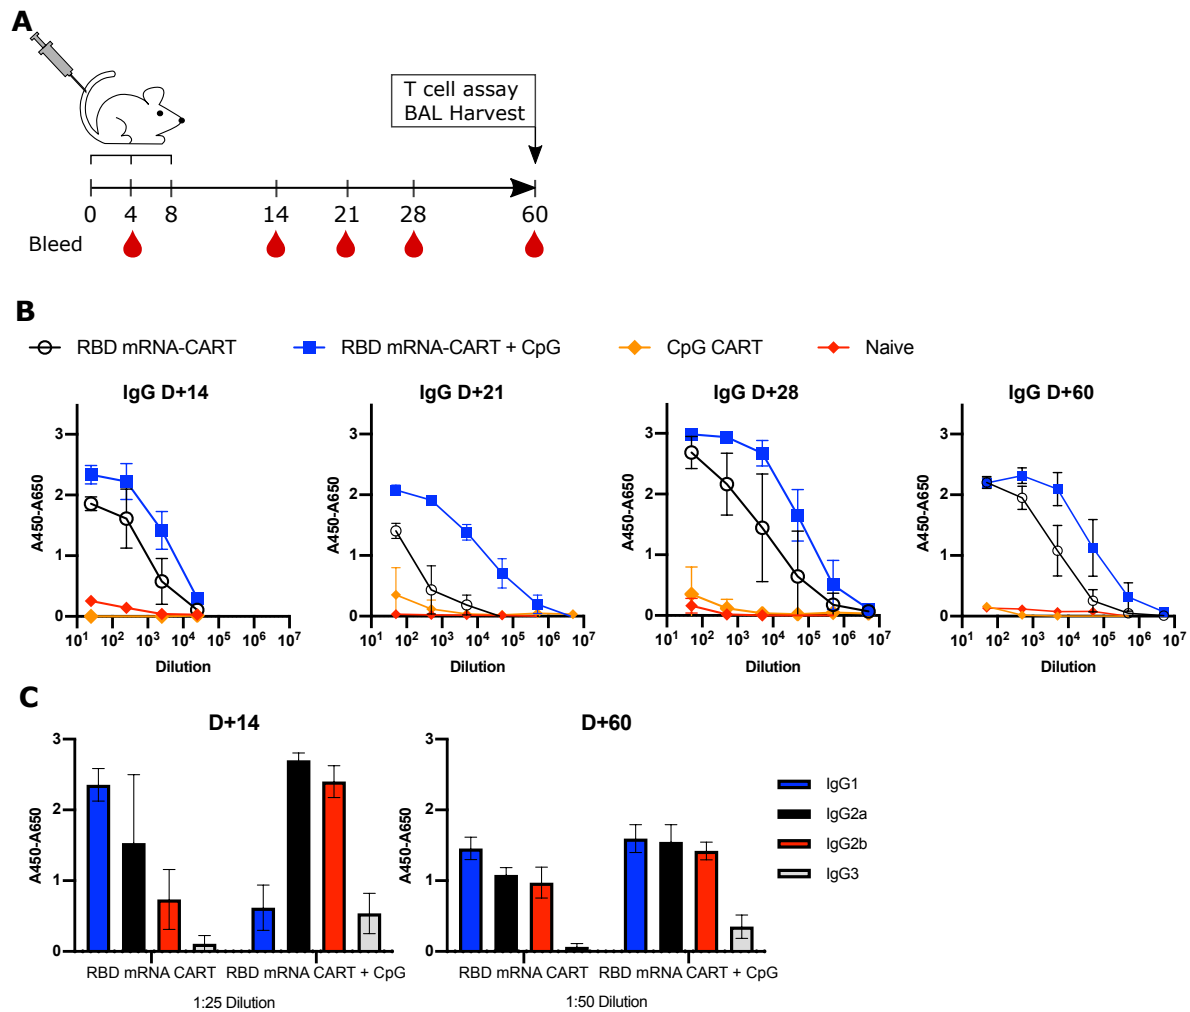

**Figure 2) Addition of CpG to RBD mRNA-CART elicits a stronger anti-RBD immunoglobulin response and leads to earlier isotype switching**

BALB/c mice were immunized intravenously with either 3 $\mu$ g RBD mRNA-CART ( $n=5$ ), 3 $\mu$ g RBD mRNA-CART plus 3 $\mu$ g CpG ( $n=5$ ), 3 $\mu$ g CpG CART ( $n=5$ ) or Naive untreated ( $n=5$ ) and boosted on Day 4 and Day 8 after priming (A). Serum levels of RBD-specific IgGs from RBD mRNA-CART (Black), RBD mRNA + CpG-CART (Blue), CpG CART (Orange), and Naive (Red) mice were monitored over the course of 60 days post priming by ELISA (B). On Day 14 and Day 60 after priming the distribution of IgG isotypes specific to RBD was analyzed using anti-mouse IgG1 (Blue), IgG2a (Black), IgG2b (red) and IgG3 (grey) monoclonal antibodies by ELISA (C). Data representative of 2 individual experiments.

### Addition of CpG results in early isotype switching of RBD-specific antibody responses

By day 14, we observed that the CpG co-formulated vaccine induced an RBD-specific Ig response that had undergone isotype switching from IgG1 to IgG2a, IgG2b and IgG3. By contrast, mice receiving the vaccine formulation without co-formulated CpG produced predominantly unswitched IgG1 (Fig. 2C and supplementary Fig. 4A, B). By day 60, these differences were less apparent, however we detected higher levels of all classes of RBD specific antibodies in serum of mice vaccinated with the CpG-containing vaccine (Fig. 2C and supplementary Fig. 4 B).

## Antibodies induced by the RBD mRNA + CpG-CART vaccine inhibit RBD-ACE2 binding and neutralize pseudotyped viral entry

The induced anti-sera were next tested for their ability to inhibit the RBD-ACE2 interaction (Fig. 3A) and to block pseudotyped viral entry into ACE2 expressing target cells (Fig. 3B). Functional RBD-ACE2 receptor blocking was assayed both against the binding of RBD protein to the ACE2 expressing target cell by flow cytometry (data not shown) and by binding to solid phase coated with ACE2 protein. On day 28, we observed a striking difference in the level of neutralizing antibodies between the group that had received the vaccine containing the CpG as compared to the group vaccinated without the adjuvant. While anti-sera from the RBD mRNA + CpG-CART group displayed a high degree of receptor blocking and pseudotyped viral neutralization with IC<sub>50</sub> of 1:500 and 1:18000 respectively, the anti-sera from mice vaccinated with RBD mRNA-CART was only barely positive above background (Fig. 3A, B). However, by day 60 antisera from mice vaccinated with RBD mRNA-CART were able to block RBD-ACE2 receptor binding and neutralize pseudotyped viral entry, although to a lesser extent than antisera from mice vaccinated with RBD mRNA + CpG-CART (Fig. 3A, B). The results from the receptor interaction blocking assay and the pseudovirus neutralization assay were well correlated.

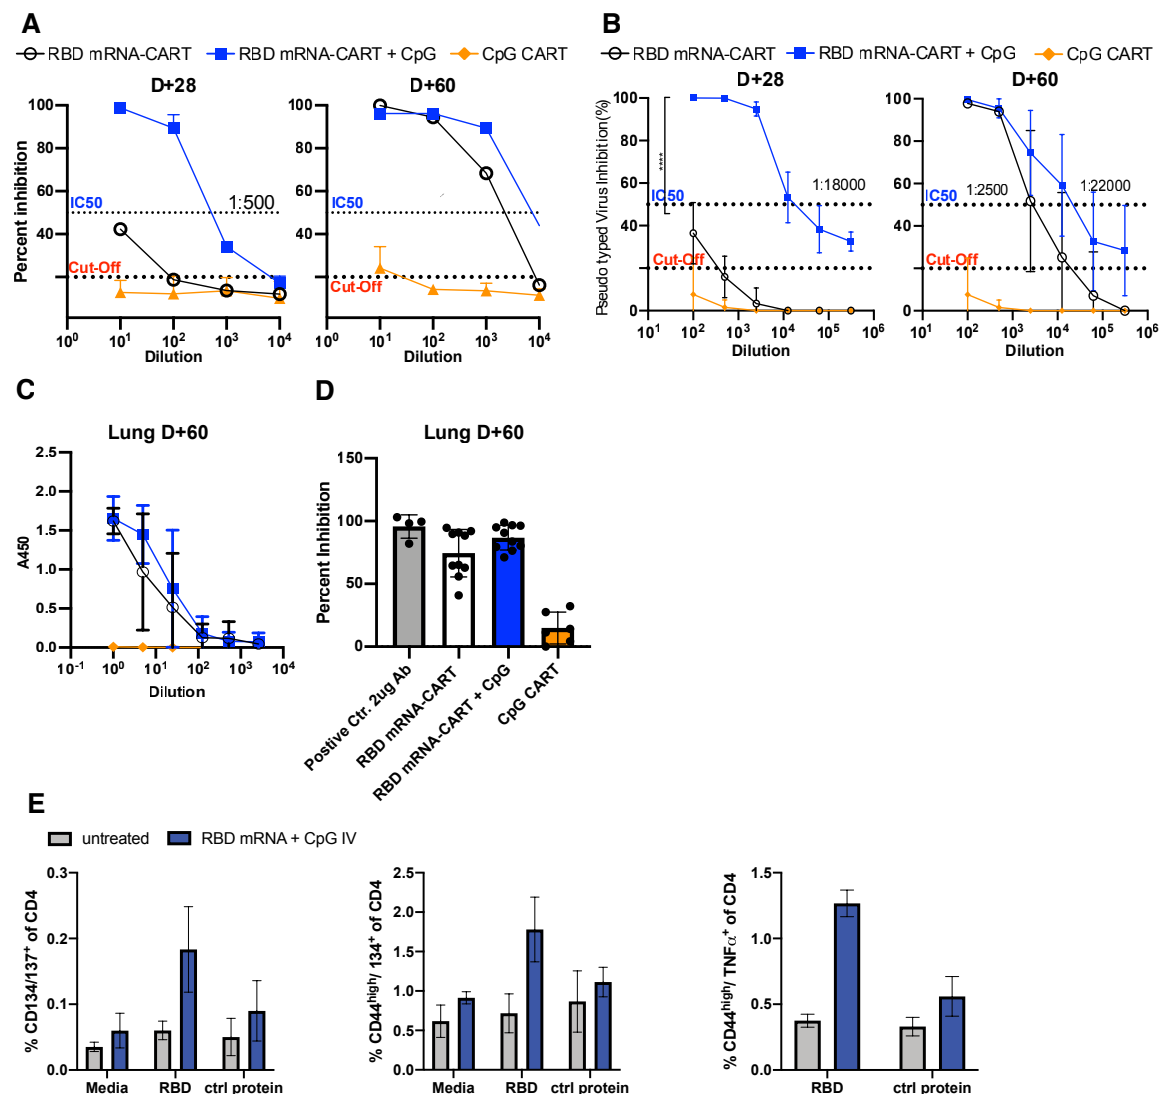



### **Figure 3 RBD mRNA + CpG-CART generates early high levels of RBD neutralizing antibodies**

BALB/c mice ( $n=5$ ) were immunized as described in Fig 2A. Sera from mice immunized with RBD mRNA-CART (Black), RBD mRNA + CpG-CART (Blue), CpG CART (Orange) were collected on D28 and D60 and tested in a commercially available RBD-ACE-2 inhibition assay (A). The same set of serum samples was tested in a pseudo typed virus neutralization assay. RBD expressing pseudo virus particles containing a zsGreen and Firefly Luciferase vectors were co-incubated with titrated concentrations of heat inactivated mouse serum. The pseudo virus particle-serum mix was then added to wells containing ACE-2 overexpressing 293F cells. Firefly luciferase expression was measured at 48h and 72h post experiment start (B). On D60 BAL was harvested from RBD mRNA-CART (Black), RBD mRNA + CpG-CART (Blue) and CpG-CART (Orange) immunized mice. RBD-specific total IgG was assayed by ELISA (C). BAL containing immunoglobulins were tested for their ability to inhibit binding of RBD to hACE-2 using a commercial ACE-2 inhibition kit (D). Lung single cell suspensions from naive mice (grey,  $n=3$ ) or mice vaccinated on D0 and D21 IV with  $3\mu\text{g}$  RBD-mRNA +  $3\mu\text{g}$  CpG (blue,  $n=3$ ) were collected on D28 and incubated with media alone, RBD protein or an irrelevant protein (CD81-His) [ $5\mu\text{g}/\text{ml}$ ] for 48h and stained for T cell activation markers CD134, CD137 and intracellular TNF $\alpha$  on CD4 $^+$  T cells (E). Data are shown as mean  $\pm$  SD. Data representative of 3 independent experiments (B-D) and 1 experiment (E). \*= $P<0.05$  \*\*\*= $P<0.0005$  unpaired student t-test (two-tailed)

### **Neutralizing RBD-specific antibodies in bronchoalveolar lavage of vaccinated mice**

To evaluate the presence of RBD-specific Igs in the lungs of vaccinated mice, we collected Bronchoalveolar lavage (BAL) on day 60 after treatment. RBD-specific Ig was detected in BAL from both the RBD mRNA + CpG-CART and the RBD mRNA-CART groups by ELISA (Fig. 3C). Notably, as BAL is collected by flushing lungs with 2ml sterile PBS, the Ig titers represent highly diluted samples. Importantly, although diluted, these immunoglobulins from BAL of both vaccinated groups blocked RBD-ACE2 binding on D60 (Fig. 3D).

### **RBD specific CD4 $^+$ T cells in the lung of vaccinated mice**

In mice, Ig class switching is linked to T<sub>H</sub>1 T cell responses.<sup>25,26</sup> To evaluate the vaccine induced T cell responses we prepared single cell suspensions from the lungs of IV vaccinated mice on D28 and cultured the cells for 48 hours in media alone, in the presence of soluble RBD-His protein or a control protein CD81-His. Cells were then collected and assayed by flow cytometry for T cell activation using fluorochrome conjugated monoclonal antibodies for memory and activation-specific surface proteins and intracellular cytokines. Remarkably, upon RBD protein restimulation, a defined RBD-specific CD4 $^+$ /CD44<sup>high</sup>/CD134 $^+$  and CD4 $^+$ /CD44<sup>high</sup>/TNF $\alpha$ <sup>+ activated T cell subset could be identified in lung cell suspensions from mice vaccinated with RBD mRNA + CpG-CART that could not be detected when cells were cultured with media alone or in the presence of the control protein hCD81-His (Fig. 3E). TNF $\alpha$  secretion by CD4 $^+$  T cells is associated with a T<sub>H</sub>1 polarization.</sup>

### **RBD mRNA + CpG-CART vaccine elicits robust anti-RBD Ig responses by intravenous, intramuscular and subcutaneous route of administration**

To test the efficacy of our vaccine in relation to the route of administration (ROA), we compared RBD-specific Ig responses induced by immunizations given IV, IM, or SC. Mice were primed with  $3\mu\text{g}$  RBD mRNA and  $3\mu\text{g}$  CpG formulated in CARTs on day 0 and received a boost on day 8 (supplementary Fig. 5A). While all routes of administration led to detectable neutralizing antibody titers, IV immunizations consistently gave a superior response at the analyzed timepoints D14 and D28, with no significant differences between IM and SC administration (supplementary Fig. 5B). Isotype switching occurred in all routes of administration (supplementary Fig. 5C).

## RBD mRNA + CpG-CART vaccine induces robust RBD-specific Ig responses in a clinically relevant prime-boost regimen and is independent of CpG source

Guided by the immunization regimen chosen by the currently approved SARS-CoV-2 vaccines<sup>27</sup>, mice were primed with the vaccine on day 0 and boosted on day 21. Mice were immunized either IV or IM with 3 $\mu$ g RBD mRNA + CpG-CART (Fig. 4A). Confirming previous observations, although robust responses were observed for both groups, IV immunized mice showed higher titers of anti-RBD antibodies in serum and in the BAL on both D21 and D28 (Fig. 4B-D). Anti-sera from both groups effectively inhibited RBD-ACE2 binding on D21 (supplementary Fig. 6B), although substantially more effective on D28 reflecting the difference observed in total RBD-specific IgGs between the two groups (Fig. 4C). Moreover, robust antibody responses against the complete spike protein were observed in both groups, although higher in the intravenous group (supplementary Fig. 6C). Thus, the vaccine induced anti-RBD response is primarily directed towards exposed RBD epitopes in the complete spike protein. Importantly, although CpG is required for robust isotype switched anti-RBD immunoglobulin, the response is independent of the source of CpG. We tested 4 different sources of CpG, three of the C-subclass of CpGs (CpG-C) and one to the B-subclass (CpG-B). No significant difference was observed between the different CpG-Cs (Supplementary Fig. 6 and 7), while the B-subclass CpG underperformed compared to the CpG-Cs (data not shown).

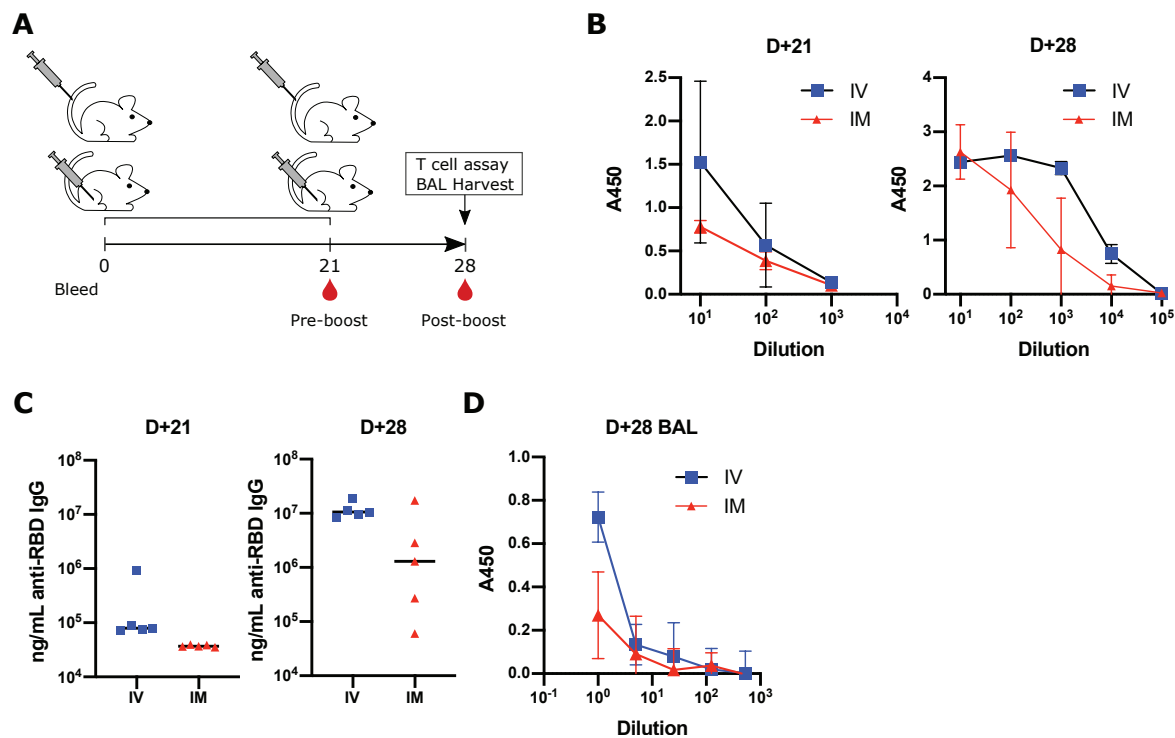

**Figure 4) RBD mRNA + CpG-CART elicits neutralizing anti-RBD immunoglobulin responses after IV and IM vaccination**

BALB/c mice ( $n=5$  per group) were immunized intravenously (IV) or intramuscular (IM) with 3 $\mu$ g RBD mRNA plus 3 $\mu$ g CpG and boosted on Day 21 after priming (A). RBD-specific immunoglobulin titers in serum were measured and quantified on Day 21 and Day 28 (B, C). On Day 28 BAL was harvested from both IV and IM treated mice and anti-RBD immunoglobulins were assayed by ELISA (D). Data are shown as mean  $\pm$  SD. Data representative of 2 independent experiments.



### **RBD mRNA + CpG-CART vaccine induced long lasting T<sub>H</sub>1 CD4<sup>+</sup> and CD8<sup>+</sup> T cell memory**

Splenocytes from mice that had received 3 $\mu$ g RBD-mRNA + 3 $\mu$ g CpG-CART vaccination either IV or IM or 3 $\mu$ g ctrl mRNA + 3 $\mu$ g CpG-CART either IV or IM on D1 and D21 were harvested on day 105 after vaccination and characterized for T cell responses by IFN $\gamma$  enzyme-linked immunosorbent spot assay (ELISpot). In this assay, pooled splenocytes were enriched for either CD4<sup>+</sup> or CD8<sup>+</sup> T cells and cultured overnight with a SARS-CoV-2 RBD peptide pool, media alone or with media supplemented with anti-mouse CD3/28. Significant IFN $\gamma$  responses in CD4<sup>+</sup> and CD8<sup>+</sup> T cells were detected by both IV and IM vaccination. Since the route of administration of IV vaccinated mice targets the spleen, it is expected that spleen T cells would give a stronger response. On the other hand, it is remarkable to detect responding T cells 105 days after vaccination (Fig. 5 A, B).

To further assess the functionality and polarization of the vaccine induced T cells we incubated Splenocytes of individual mice from the same experiment in the presence of a RBD peptide pool or media alone. After 18 hours of incubation, CD4<sup>+</sup> and CD8<sup>+</sup> T cells were assayed separately by flow cytometry for their expression of memory markers CD44 and for the intracellular cytokines IFN $\gamma$ , TNF $\alpha$  and IL-4. Even at this late time point after vaccination a significant population of RBD-specific IFN $\gamma$  producing CD4<sup>+</sup> and CD8<sup>+</sup> T cells and TNF $\alpha$  producing CD8<sup>+</sup> T cells could be identified in the RBD-mRNA + CpG-CART IV vaccinated group. There was no increase in IL-4 producing CD4<sup>+</sup> T cells, indicating that T cell memory was predominately T<sub>H</sub>1 (Fig. 5 C, D, supplemental Fig. 8). In contrast to the IFN $\gamma$  ELISpot results we were not able to identify these low frequency populations (mean 28 and 55 IFN $\gamma$  spots per 5x10<sup>5</sup> cells for CD4<sup>+</sup> and CD8<sup>+</sup> enriched conditions respectively) in the IM vaccinated mice by flow cytometry.

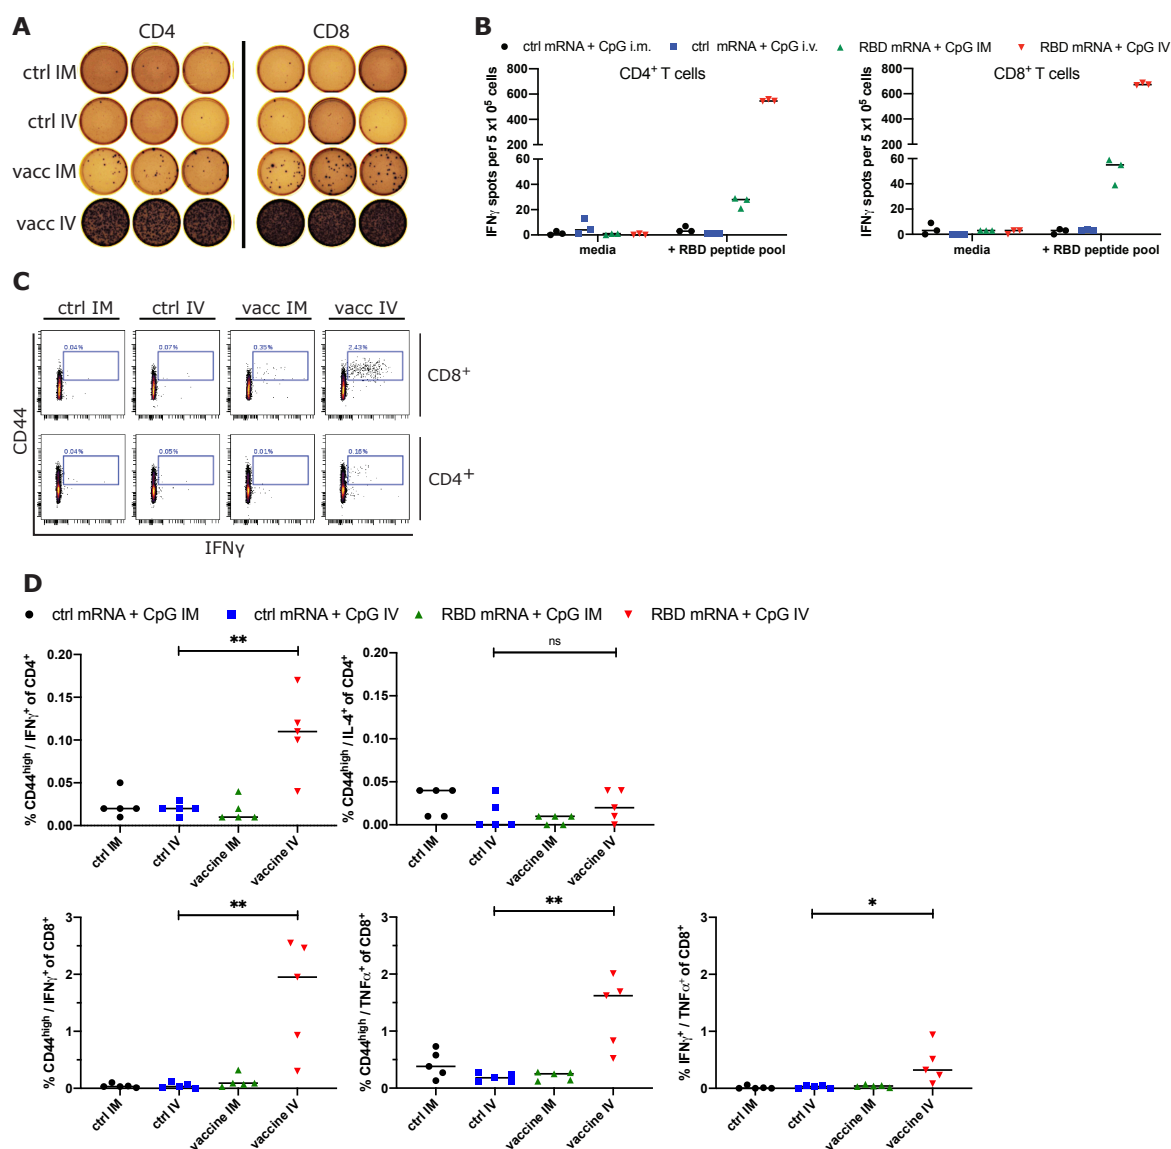

**Figure 5) RBD mRNA plus CpG vaccination induces long lasting memory  $T_H1$  CD4<sup>+</sup> and CD8<sup>+</sup> T cell responses**  
BALB/c mice ( $n=5$  per group) were immunized intravenously (IV) or intramuscular (IM) with  $3\mu\text{g}$  ctrl mRNA +  $3\mu\text{g}$  CpG or  $3\mu\text{g}$  RBD mRNA +  $3\mu\text{g}$  CpG on D1 and boosted on D21 after priming. On day 105 pooled splenocytes were harvested, enriched for CD4<sup>+</sup> and CD8<sup>+</sup> T cells and stimulated separately for 16h with a RBD peptide mix for direct ex vivo IFN $\gamma$  ELISpot assay (A, B). For ELISpot analysis splenocytes from the respective groups were measured in triplicates. Additionally, whole splenocytes of individual mice ( $n=5$  per group) were incubated with media or a RBD peptide pool for 18h. After incubation cells were collected and stained for T cell memory marker CD44 as well as intracellular cytokines IFN $\gamma$ , TNF $\alpha$  and IL-4 (C, D). Each dot represents the measurement of an individual mouse. \*\*\*\*= $P<0.00005$ , \*\*= $P<0.005$ , \*= $P<0.05$  student t test (unpaired, two tailed).

### Neutralizing antibody levels of immunized mice are comparable to those achieved in vaccinated humans

Results from clinical trials indicate that the Pfizer/BioNTech mRNA vaccine and the Moderna vaccine both conferred protection from symptomatic infection prior to administration of their second booster vaccine doses.<sup>28,29</sup> This implies that the antibody levels in humans at that early pre-boost time point are sufficient to confer disease protection. Accordingly, we compared the levels of neutralizing antibodies achieved in our vaccinated mice to those in immunized humans both prior to and after their boosters. BALB/c mice were vaccinated with  $3\mu\text{g}$  RBD

mRNA + 3 $\mu$ g CpG-CART either IM or IV on D1 and D21 and serum was collected on D28. These mice sera were then compared to sera from 13 individual vaccinated humans collected 15-21 days after their priming vaccination and then again 15+/-4 days after their booster vaccinations. The level of RBD-ACE2 inhibition achieved with post boost sera from our IM and IV vaccinated mice was similar to or higher than that of the human pre-boost sera. The inhibitory antibody levels in the mice receiving the IV vaccination equaled those in humans post boosting (Fig. 6A, B).

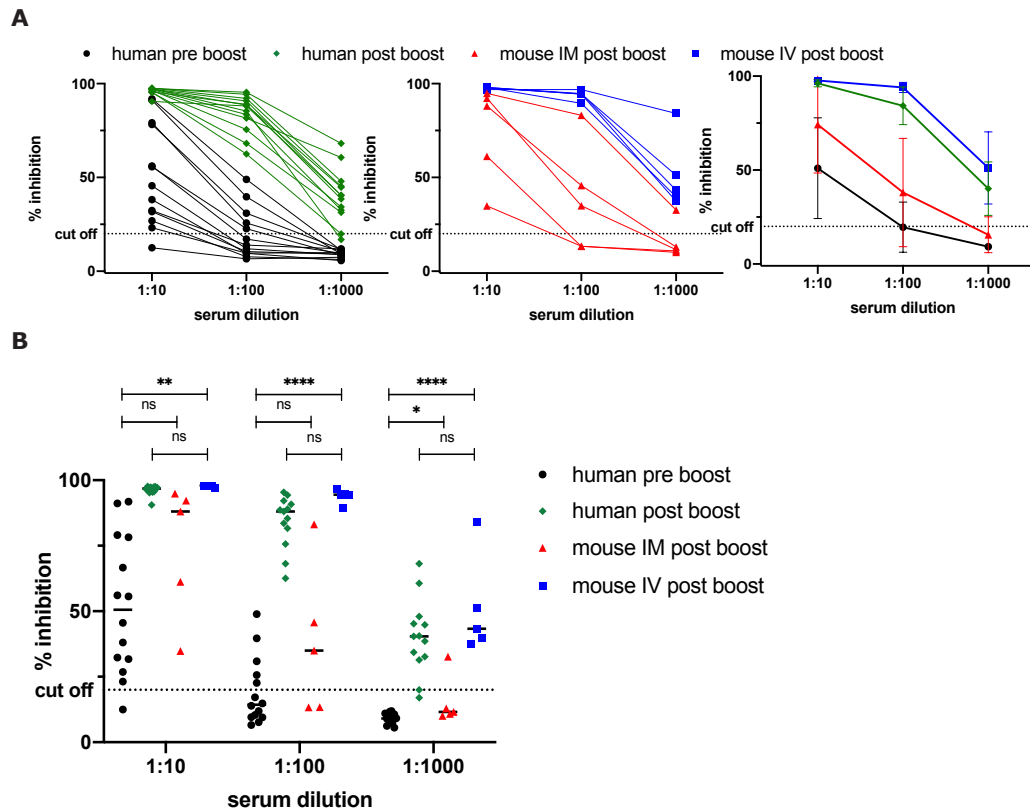

**Figure 6) Neutralizing antibody levels of immunized mice are comparable to those achieved in vaccinated humans**

Serum from immunized mice (IM in red, IV in blue, n=5) was harvested on Day 28. Serum from blood donors (n=13) who were vaccinated with the Pfizer/ BioNTech mRNA vaccine was collected either within 7 days before (pre boost, black) or 15 $\pm$ 4 days after the boost (post boost, green) was tested for the ability to inhibit RBD/ACE-2 binding using a commercially available surrogate Virus Neutralization Test. \*\*\*\*= $P < 0.00005$ , \*\*= $P < 0.005$  two way anova

## Discussion

For the first time mRNA-based therapeutics have been approved by the FDA and the success of both mRNA-based SARS-CoV-2 vaccines is both remarkable and mutually validating. However, challenges in production, deployment and availability of SARS-CoV2 vaccines remain. One important aspect for the continuous success and refinement of mRNA-based therapeutics in general, will be to create access to diverse choices of safe delivery vehicles with varying chemical and biological properties. Here we demonstrate an effective mRNA vaccination strategy against the clinically relevant RBD antigen of SARS-CoV-2 using an alternative mRNA delivery platform to the clinically used lipid nanoparticles. We observed an effective SARS-CoV-2 specific immune response that was enhanced by the inclusion of the TLR9 agonist CpG as adjuvant. We further showed that the resulting anti-RBD sera were able

to neutralize pseudoviral entry into ACE2-expressing cells. Focusing on the ACE2 receptor binding domain of the SARS-CoV-2 virus we were able to generate high amounts of isotype switched RBD-specific neutralizing antibodies in both serum and lungs of immunized animals. The levels of neutralizing antibodies in immunized mice were similar (IM) or higher (IV) than the levels of neutralizing antibodies measured in pre-boost blood samples from humans vaccinated with the Pfizer/BioNTech mRNA vaccine. Since it has been shown that this approved mRNA vaccine confers protection by day 12 post prime, this is an indication that our vaccine induced neutralizing antibody levels sufficient to confer protection.<sup>28</sup> Finally, the RBD mRNA + CpG-CART vaccine induced RBD-specific CD4<sup>+</sup> and CD8<sup>+</sup> T cell responses with induction of long-lasting T cell memory of T<sub>H</sub>1 polarization. In addition, the IgG isotype profile dominated by IgG2a and IgG2b confirms a T<sub>H</sub>1 polarized T cell response.

When compared to LNPs, CARTs have unique biodistribution, selectively delivering mRNA to the spleen or other organs without the need for targeting ligands, simply through changes in the CART structure. CARTs can be readily prepared and be formulated with multiple mRNAs in any desired nucleotide combination<sup>21</sup>, only require a single structural component that is mixed with mRNA, and do not require specialized microfluidics instruments for their manufacture. In contrast to LNPs, CARTs have no unspecific immunostimulatory effects, which allows more flexibility for vaccine design and the option to choose the appropriate adjuvant to co-deliver with mRNA, rather than relying on the inherent immunogenicity properties of LNPs. When CARTs are injected IM, gene expression localizes exclusively at the site of injection and does not spread to other organs. In a SARS-CoV-2 vaccine study using I.M. injection of LNPs, the liver showed the highest level of reporter gene and antigen expression.<sup>19</sup> In addition, IV injection of CARTs confer mRNA expression exclusively to the spleen which could explain the higher potency of IV compared to the IM routes. While IV administration of the vaccine induced a stronger antibody and T cell response, significant responses could be induced via both routes of administration. Interestingly, it has been shown recently that IV vaccination with a BCG vaccine against tuberculosis profoundly altered the protective outcome in non-human primates with an increase of antigen responsive CD4<sup>+</sup> and CD8<sup>+</sup> T cells in blood, spleen, BAL and lung lymph nodes when compared to the established intradermal or aerosol administration.<sup>30</sup> Additionally, IV administered mRNA lipid nanoparticles have demonstrated potency in preclinical mouse models of therapeutic cancer vaccination.<sup>31</sup>

We chose to direct our vaccine specifically against the RBD rather than the whole spike protein sequence. Potent humoral and cellular immune responses have been observed in clinical trials with both the SARS-CoV-2 full-length spike protein and RBD.<sup>6</sup> Moreover, an RBD mRNA directed vaccine was proven safe in a phase 1/2 clinical trial tested in the US and in Germany.<sup>27,32</sup> In addition, the RBD provides essential targetability for humoral and cellular immune responses. Piccoli et al. showed that 90% of the neutralizing activity of serum from exposed patient target the RBD.<sup>33</sup> RBD is also an epitope for T cell responses against SARS-CoV-2 S protein.<sup>34</sup> A fast-spreading mutant with a mutation in the RBD (N501Y) has been identified in the UK (B.1.1.7) raising concerns about coverage of the current mRNA-based vaccines.<sup>6</sup> This N501Y mutation does not seem to affect the efficacy of an RBD vaccination since mice vaccinated against the original RBD sequence were able to clear a SARS-CoV-2 variant containing the specific mutation.<sup>35</sup> However recent data indicates that other clinically relevant RBD and non-RBD mutations can mediate escape from vaccine induced humoral

immunity<sup>13,36</sup>, highlighting the urgent need of flexible and rapidly adaptable vaccine platforms.

We believe that the ability to formulate TLR activating molecules like CpG into our vaccine will aid in inducing a protective immune response in populations with less competent immune systems and that are more at risk for severe COVID19 symptoms. Our three-component vaccine incorporates a controlled addition of an adjuvant that directly stimulates APCs. CpG directly activates pDCs and B cells, contributing to the induction of both innate and adaptive immune responses. The cascade of events initiated by CpG indirectly supports the maturation, differentiation and proliferation of natural killer cells, T cells and monocytes/macrophages.<sup>37-40</sup> B cells activated by CpG upregulate expression of their Fc receptor (FcR) and costimulatory molecules including MHC class II, CD40, CD80 and CD86.<sup>41-43</sup> Subsequently, the CpG-stimulated B cells proliferate and differentiate into plasma cells and memory B cells.<sup>44</sup> The adjuvant effects of CpG are supported by our study where the addition of CpG resulted in a more rapid immune response, higher anti-RBD titers in serum and bronchoalveolar lavage, more effective ACE2-RBD inhibition and pseudo typed virus neutralization, increased T cell response, and more pronounced isotype switching.

In conclusion, our study demonstrates the potency and flexibility of this mRNA-CART vaccine platform against the clinically relevant SARS-CoV-2 RBD antigen. The robust induction of both B and T cell responses via different routes of administration warrants further exploration and its use as an alternative to the clinically approved lipid nanoparticles in the general development of mRNA-based therapeutics against infectious diseases.

## **Material and Methods**

### **Recombinant Proteins**

The pCAGGS plasmids coding for soluble RBD-His, residues 319-541, and spike-His, residues 1-1213 from the Wuhan-Hu-1 genome sequence (GenBank MN9089473) were a gift from Prof. Florian Krammer (Icahn School of Medicine at Mount Sinai).<sup>23</sup> The pcDNA3 plasmid coding for a soluble ACE2-hIgA FC fusion protein was purchased from addgene (ID 145154). Plasmids were expanded using One Shot™ TOP10 Chemically Competent E. coli (ThermoFisher Scientific) and the ZymoPURE II Plasmid Maxiprep Kit (Zymo Research). Recombinant proteins were produced using the Expi293F cells (Thermo Fisher Scientific) by transfecting 200x10<sup>6</sup> of these cells with purified DNA using the ExpiFectamine 293 Transfection Kit (Thermo Fisher Scientific). Supernatants from transfected cells were harvested 3 days post transfection by centrifugation at 300g for 10 min and filtration through a 22um filter. RBD-His and Spike-his containing supernatants were batch purified using the HisPur™ Ni-NTA Resin (ThermoFisher Scientific). Supernatants were incubated with 6 ml of resin for 1h at RT. Then, the resin was recovered by centrifugation (2 min at 700g), washed and finally eluted per manufacturer recommendation. Elution fractions were analyzed by SDS-PAGE and western blot to confirm RBD-His or Spike-His purification and the positive fractions were pooled.

### **In vitro transcription**

The RBD-6his was cloned from the pCAGGS expression plasmid into the LF-pLMCT plasmid that contains a T7 promoter and a polyA sequence required for mRNA synthesis. The LF-pLMCT plasmid was a gift from Dr. Kris Thielemans (Free University of Belgium). The RBD-6his

coding sequence was amplified by PCR using PHUSION polymerase (NEB) and TAACTTAAGACAACCATGGTCGTGTTTCTGGTGC as a forward primer and GGGGATCCcGTCTTCCTCGAGTTATCAATGGTGATGGTGA as reverse primer. The PCR product was then inserted into pLMCT by NcoI and XhoI. mRNA coding for RBD was synthesized per manufacturer recommendation using Hiscribe T7 (NEB) with co-transcriptional CleanCap AG (Trilink), N1-methyl-pseudouridine (Trilink) and 5-Methylcytidine (Trilink). The template for in vitro transcription was a PCR amplicon from the pLMCT-RBD-6His produced using the PHUSION high fidelity DNA polymerase (NEB) and TGTGGAATTGTGAGCGGATA as forward primer and CTTCACTATTGTGCGACAAAAAAAAAAAAAAAAAAAAAAAAAAAAAAAAAAAAAAAAAAAAAAAAA as reverse primer.

### **CART preparation and characterization**

CART O<sub>6</sub>-stat-N<sub>6</sub>: A<sub>9</sub>, consisting of a first block of a 1:1 statistical mixture of oleyl and nonenyl-substituted carbonate monomers, followed by a block of  $\alpha$ -amino ester monomer was prepared as previously reported.<sup>14,15</sup> Briefly, to a mixture of nonenyl (29 mg, 1 mmol), and oleyl carbonate (40.5 mg, 1 mmol) in toluene (150  $\mu$ L) was added TU, DBU, and BnOH (5 mol% TU/DBU, 0.2 mmol BnOH) in 50  $\mu$ L toluene. The reaction was stirred for 1.5 hours, then the morpholinone monomer (33.4 mg, 0.16 mmol) was added as a solid then stirred for an additional 2.5 hours. The reaction was quenched with AcOH then dialyzed overnight in DCM/MeOH (3.5 kDa M.W, cut-off). Concentration after dialysis afforded 85 mg clear residue which was deprotected with TFA (0.85 mL) in dry DCM (8.5 mL) overnight. Endgroup analysis of the deprotected polymer showed block lengths of 6 nonenyl and 6 oleyl carbonate units and 9 cationic aminoester units.

### **CART oligonucleotide formulation**

To prepare the CART-vaccine, CARTs were formulated with a mixture of CpG and RBD mRNA at a 10:1 cation: anion ratio assuming full protonation of the CART and full deprotonation of the oligonucleotides (1:1 mass ratio of CpG and mRNA nucleotides). Formulations were prepared by mixing the reagents for 20 seconds in acidic PBS (pH adjusted to 5.5 by addition of 0.1M HCl) in a total volume of 50-100 $\mu$ L, followed by a brief spin in a tabletop centrifuge. The formulation was used within 5 minutes for in vitro or in vivo experiments.

### **Mouse vaccination**

Eight- to twelve-week-old female BALB/c mice were purchased from The Jackson Laboratory and housed in the Laboratory Animal Facility of the Stanford University Medical Center. All experiments were approved by the Stanford Administrative Panel on Laboratory Animal Care and were conducted in accordance with Stanford University Animal Facility and NIH guidelines. RBD-mRNA and CpG were formulated with CART polymer in PBS at pH 5.5 as described above. Mice were injected with 3 $\mu$ g RBD-mRNA formulated with 2.6 $\mu$ L CART (5mM) or 3 $\mu$ g CpG formulated with 2.6 $\mu$ L CART (5mM) or 3 $\mu$ g RBD-mRNA plus 3 $\mu$ g CpG formulated with 5.2 $\mu$ L of CART (5mM). Mice were vaccinated by IV, IM or SC injection and were boosted as described in the experiment. CARTs are formulated at indicated concentrations of mRNA in 50-100  $\mu$ L total volume. For IV administration 100  $\mu$ L formulated CART was administered per tail vein injection. For IM injections 50  $\mu$ L of formulated CART



was injected in the thigh muscle. SC injections were administered on the back of the mouse near the tail. At indicated time points mice were bled and serum was collected.

### **Hela and 293F transfection**

Hela cells and 293F cells were plated at  $10^6$  cells per well in a 12 well plate in Opti-MEM media (ThermoFisher Scientific). 2  $\mu$ g of the RBD-his mRNA or GFP mRNA (Trilink) was formulated in 6.6  $\mu$ l of PBS pH 5.5 with 1.37  $\mu$ l of 5mM CART and added to the cells. After 4 hours of transfection, Opti-MEM media was replaced by RPMI media containing 10 % FCS and Penicillin-Streptomycin 1000 U/ml. 12 hours post transfection RBD and GFP expression were monitored by western blot and fluorescence microscopy, respectively.

### **Western blot**

15ul of media from Hela or 293F transfected cells were mixed with 4x sample loading buffer (Invitrogen) and were loaded on a 4-12% NuPAGE gel (Invitrogen). Electrophoresis was performed in an MES buffer at 200V for 35 min. Proteins were transferred to a cellulose membrane using the iBLOT system (Invitrogen). The membrane was stained with Ponceau red to verify protein transfer then the membrane was blocked for 1h in TBST containing 5% non-fat dry milk. The membrane was washed 3 times in TBST and incubated in TBST containing 5% non-fat dry milk and 1:1000 mouse anti-His (Biolegend) overnight. After 3 washes in TBST the membrane was incubated with 1:10000 anti-mouse Ig (Southern Biotech) in TBST containing 5% non-fat dry milk for 1 hour. After 3 washes in TBST the blot was revealed using the EC<sup>TM</sup> Prime Western Blotting System (Sigma). The membrane was imaged using a Chemidoc MP imaging system from BioRad.

### **Serum preparation**

For human samples, informed consent was obtained from the subjects prior to blood draw. Blood was collected in Eppendorf tubes and allowed to coagulate for 60 min at room temperature. After 10 min of centrifugation at 1000xg the supernatant was collected. Serum was heat inactivated at 56°C for 30 min.

### **ELISA**

Nunc-Immuno<sup>TM</sup> MicroWell<sup>TM</sup> 96 well ELISA plates (MilliporeSigma) were coated overnight with 50ul per well of 2ug/ml RBD-His or Spike-His protein in carbonate buffer pH9. After 3 washes in ELISA wash buffer (PBS with 0.1% Tween 20), plates were blocked using 100ul of 5% nonfat dry milk diluted in TBS buffer containing 0.1% Tween 20 (TBST) for 1 hour at room temperature. Serum, BAL and antibody dilutions were prepared in TBST containing 1% nonfat dry milk. The blocking solution was removed and 50  $\mu$ l of each serial dilution was added to the plate for 1 hour at room temperature. Plates were washed three times and incubated with HRP conjugated anti-human Ig (1:5000, BioSource), anti-mouse Ig (1:5000, Cell Signaling), anti-mouse IgG2a (1:5000, Southern Biotech), anti-mouse IgG2b (1:5000, Southern Biotech), anti-mouse IgG1 (1:5000, Southern Biotech), anti-mouse IgG3 (1:5000, Southern Biotech), anti-mouse IgA (1:5000, Invitrogene), or anti-mouse IgM (1:5000, Southern Biotech). Plates were washed three times and 100  $\mu$ l of TMB ELISA Substrate (Abcam) were added to each well. ELISA was allowed to develop for 10 min and then the reaction was stopped by adding 50  $\mu$ l of Stop Solution for TMB Substrates (ThermoFisher Scientific) to each well. In some assays, a human anti-RBD (Invivogene) of known antibody concentration was used as

standard. Optical density at 450nm (OD450) was measured using a SpectraMax Paradigm Microplate Reader (Molecular devices).

### **RBD-ACE2 interaction blocking assay ELISA**

RBD-ACE2 interaction blocking assay was evaluated using three methods: a commercial kit from Genescript and an in house developed ELISA and by flow cytometry.

For the commercial kit, we used the SARS-CoV-2 Surrogate Virus Neutralization Test (sVNT) Kit (Genescript) following the manufacturer's instructions. In short samples and controls were diluted at indicated ratios with Dilution buffer and pre-incubated with HRP-RBD in a 1:1 ratio for 30min at 37°C. Samples were then added to the capture plate in wells pre-coated with hACE2. After 15' incubation at 37°C wells were washed four times with wash buffer. TMB solution was added and incubated for 15' at room temperature in the dark. After 15' stop solution was added to the wells and promptly analyzed. Optical density at 450nm (OD450) was measured using a SpectraMax Paradigm Microplate Reader (Molecular devices).

For the in-house developed ELISA, Nunc-Immuno™ MicroWell™ 96 well ELISA plates (Millipore) were coated overnight with 50 µl per well of 2ug/ml RBD-His or Spike-His protein in carbonate buffer pH9. After 3 washes in ELISA wash buffer (PBS with 0.1% Tween 20), plates were blocked using 100ul of 5% nonfat dry milk diluted in TBS buffer containing 0.1% Tween 20 (TBST) for 1 hour at room temperature. Serum, BAL and antibody dilutions were prepared in TBST containing 1% nonfat dry milk. The blocking solution was removed and 50 µl of each serial dilution was added to the plate for 1 hour at room temperature. Plates were washed three times and 50 µl of 2 times diluted ACE2-hIgA supernatant was added to each well for 1 hour. After 3 washes, plate was incubated with HRP conjugated anti-human IgA (1:1000, Thermo Scientific) for 1hour in TBST with 1% non-fat dry milk. Plates were washed three times and 100 µl of TMB ELISA Substrate (Abcam) were added to each well. ELISA was allowed to develop for 10 min and then the reaction was stopped by adding 50 µl of Stop Solution for TMB Substrates (ThermoFisher Scientific) to each well. In some assays human anti-RBD (Invivogen) of known antibody concentration was used as standard. Optical density at 450nm (OD450) was measured using a SpectraMax Paradigm Microplate Reader (Molecular devices).

For the flow cytometry assay, RBD-His 2ug/ml was incubated with sera for 1 hour. Then, the  $4 \times 10^5$  ACE2 expressing HEK293T cells were added to the RBD-His/sera mix and incubated at RT for 30 min. Cells were then washed 2 times in PBS containing 1% BSA. RBD was then detected using an Alexa Fluor 488 conjugated anti-His antibody (clone J099B1, Biolegend). Cells were analyzed on a flow cytometry (BD).

### **Pseudo-virus assay**

Pseudo-typed lentivirus expressing the Sars-Cov-2 spike protein and the luciferase was produced in HEK293T cells as previously described<sup>45,46</sup>. One day before transfection,  $6 \times 10^6$  HEK293T cells were seeded in a 10-cm culture plate in RPMI containing 10% FCS, 2mM L-glutamine, streptomycin and penicillin. Using TransIT (Mirus), cells were then transfected with 10 µg of the lentiviral packaging vector (pHAGE\_Luc2\_IRES\_ZsGreen), the 3.4 µg of SARS-CoV-2 spike, and lentiviral helper plasmids (2.2 µg of HDM-Hgpm2, 2.2 µg of HDM-Tat1b, and 2.2 µg of pRC-CMV\_Rev1b). The spike vector contained the full-length wild-type spike sequence from the Wuhan-Hu-1 strain of SARS-CoV-2 (GenBank NC\_045512). These 5 plasmids were kindly provided by Dr. Jesse Bloom (Fred Hutch Seattle, University of

Washington). 72 hours post transfection, virus-containing supernatant was harvested, centrifuged at 300g for 5 minutes, filtered on a 0.45 µm filter, aliquoted and frozen at -80°C.

For viral neutralization assays, ACE2-expressing HEK293T<sup>46</sup> cells were plated in poly-L-lysine-coated, white-walled clear-bottom 96-well plates at 12,500 cells/well 1 day prior to infection. Mouse serum was centrifuged at 2,000 x g for 15 min, heat inactivated for 30 min at 56 °C and diluted in D10 media (DMEM medium supplemented with 10% FCS). Virus was diluted in D10 medium, supplemented with polybrene (5 µg/mL), and then added to serum dilutions. The virus/serum mix was preincubated for 1 hour at 37°C before it was added to the cells and incubated at 37 °C for ~48 h. Cells were lysed by adding BriteLite assay readout solution (Perkin Elmer) and luminescence values were measured with a SpectraMax Paradigm Microplate Reader (Molecular devices). As positive control a neutralizing human anti-SARS-CoV-2 IgG1 antibody was used (Acro).

### **Bronchoalveolar lavage**

Mice were sacrificed and lungs were inflated 2 times with 1 ml of PBS following a previously described procedure<sup>47</sup>. Lavage fractions were pooled and centrifuged at 1200 rpm for 5 min. Supernatant was collected and assayed for anti-RBD antibodies by ELISA.

### **T cell response assay lung**

Mouse lungs were harvested at indicated days after vaccination. To prepare lung single cell suspensions, lungs were cut into small pieces and incubated at 37°C in RPMI containing Collagenase D (2mg/ml, Sigma) and DNase (50ug/ml, Sigma) for 30min. Then, digestion mix was diluted 5 times and the lung preparations were processed through a 70-µm cell strainer. Red blood cells present in the spleen or lung single cell suspensions were lysed using ACK buffer (ThermoFisher Scientific). Single cell suspensions were kept on ice until further processing for T cell response assay. Cells were cultured in 96-well plates (Corning, V-bottom) at  $1 \times 10^6$  cells/well and stimulated for 48 hours with 5 µg/mL of RBD-His or hCD81-His or media alone (RPMI + 5% FCS) in the presence of anti-mouse CD28 antibody [0,5 µg/ml] (Southern Biotech). As positive control cells were stimulated with anti-mouse CD3 [0,05 µg/ml] (Southern Biotech). For intracellular staining, cells were treated with GolgiStop (BD Biosciences) for 5 hours prior to staining. Following stimulation, cells were washed, stained with Aqua Live/dead viability dye (Thermo Fisher) in PBS, washed two additional times and stained with a cocktail of monoclonal antibodies and Fc block: CD16/32, CD4 BV605 RM4-5, CD8 FITC 53-6.7, CD44 APC IM7, CD69 PE-Cy7 H1.2F3, CD134 BV786 OX-86, CD137 PE 1AH2, CD45R/B220 Per-CP 5.5 RA3-6B2 (all BD Bioscience). Cells were fixed and permeabilized according to manufacturer's protocol (BD Biosciences) and stained with aTNF $\alpha$  BV650 MP6-XT22 (BD Bioscience). Cells were washed, fixed with 2% formaldehyde and acquired on a BD LSR II and analyzed using Cytobank V7.3.0.

### **T cell response assay spleen**

Mouse spleens were harvested on D105 after vaccination and single-cell suspensions were prepared by processing them through a 70-µm cell strainer (BD Biosciences). Cells were then incubated in FACS tubes at  $6 \times 10^5$  cells per tube and stimulated for 18 hours with 2 µg/ml RBD peptide mix (PepMix SARS-CoV-2 (S-RBD) Protein ID: PODTC2 PM-WCPV-S-RBD-1, JPT) or media alone. As positive control cells were stimulated with anti-mouse CD3 [0,05 µg/ml] (Southern Biotech) and anti-mouse CD28 antibody [0,5 µg/ml] (Southern Biotech). GolgiStop

(BD Biosciences) was added for the last 10 hours of the assay. Following stimulation, cells were washed, stained with Aqua Live/dead viability dye (Thermo Fisher) in PBS, washed two additional times and stained with a cocktail of monoclonal antibodies and Fc block: CD16/32, CD4 Ax700 RM4-5, CD8 APC-H7 53-6.7, CD44 APC IM7 (all BD Bioscience). Cells were fixed and permeabilized according to manufacturer's protocol (BD Biosciences) and stained for intracellular cytokines with IFN $\gamma$  PE-Cy7 XMG1.2, TNF $\alpha$  BV650 MP6-XT22 and IL-4 BV786 11B11 (BD Bioscience). Cells were washed, fixed with 2% formaldehyde and acquired on a Cytex Aurora (Northern Lights) and analyzed using Cytobank V7.3.0.

### **IFN $\gamma$ ELISpot**

The assay was performed following the manufacturer's instructions (R&D systems, mouse IFN $\gamma$  Kit Cat # EL485). In short IFN $\gamma$  ELISpot analysis was performed *ex vivo* (without further *in vitro* culturing for expansion) using PBMCs depleted of CD4<sup>+</sup> and enriched for CD8<sup>+</sup> T cells or depleted of CD8<sup>+</sup> and enriched for CD4<sup>+</sup> T cells by MACS sort (Miltenyi CD4<sup>+</sup> or CD8<sup>+</sup> microbeads following manufacturer instructions). Tests were performed in triplicates and with a positive control (anti-CD3 monoclonal antibody (0,05  $\mu$ g/ml; Southern Biotech). PVDF backed microplate plates pre-coated with IFN $\gamma$ -specific antibodies (R&D systems, mouse IFN $\gamma$  Kit Cat # EL485) were washed with PBS and blocked with RPMI medium (Corning) containing 5% FCS for 20min at room temperature. Per well,  $5 \times 10^5$  effector cells were stimulated for 16h with 2  $\mu$ g/ml RBD peptide mix (PepMix SARS-CoV-2 (S-RBD) Protein ID: PODTC2 PM-WCPV-S-RBD-1, JPT). After stimulation wells were washed and incubated with a biotinylated anti-IFN $\gamma$  antibody (R&D systems, mouse IFN $\gamma$  Kit Cat # EL485) overnight at 4°C. Next day wells were washed and incubated with Streptavidin-AP (R&D systems, mouse IFN $\gamma$  Kit Cat # EL485) for 2h at RT. After washing wells were incubated with a 5-bromo-4-chloro-3'-indolyl phosphate (BCIP)/nitro blue tetrazolium (NBT) substrate (R&D systems, mouse IFN $\gamma$  Kit Cat # EL485). Plates were scanned and analyzed using ImmunoSpot Microanalyzer.

### **In vivo bioluminescence imaging**

For bioluminescence assessment, mice were anesthetized with isoflurane gas (2% isoflurane in oxygen, 1 L/min) during injection and imaging procedures. Intraperitoneal injections of d-Luciferin (Biosynth AG) were done at a dose of 150 mg/kg, providing a saturating substrate concentration for Fluc enzyme (Luciferin crosses the blood–brain barrier). Mice were imaged in a light-tight chamber using an *in vivo* optical imaging system (AMI HT; Spectral Instruments imaging) equipped with a cooled charge-coupled device camera. During image recording, mice inhaled isoflurane delivered via a nose cone, and their body temperature was maintained at 37°C in the dark box of the camera system. Bioluminescence images were acquired between 10 and 20 minutes after luciferin administration. Mice usually recovered from anesthesia within 2 minutes of imaging.

### **Safety statement**

For all mouse experiments no unexpected or unusually high safety hazards were encountered

### **Acknowledgments**

We thank the Dynavax Corporation for the gift of the CpG formulation SD101. This work was supported by Fast Grants (to R.L.), Stanford University Innovative Medicines Accelerator (IMA) (R.L., R.M.W., P.A.W.); The National Science Foundation Grant NSF CHE-2002933

(to R.M.W.); NIH R01 CA031845 (P.A.W.); German Cancer Aid (Deutsche Krebshilfe) (J.J.K.L); The Child Health Research Institute at Stanford University and the SPARK Translational Research Program in the Stanford University School of Medicine (R.M.W., P.A.W., R.L). Support through the Stanford Cancer Translational Nanotechnology Training T32 Training Grant T32 CA196585 funded by the National Cancer Institute (T.R.B).

## References

- 1 Padron-Regalado E. Vaccines for SARS-CoV-2: Lessons from Other Coronavirus Strains. *Infect Dis Ther* **2020**; *9*(2): 1–20.
- 2 Zhao J, Zhao S, Ou J, Zhang J, Lan W, Guan W *et al*. COVID-19: Coronavirus Vaccine Development Updates. *Front Immunol* **2020**; *11*: 602256.
- 3 Alberer M, Gnad-Vogt U, Hong HS, Mehr KT, Backert L, Finak G *et al*. Safety and immunogenicity of a mRNA rabies vaccine in healthy adults: an open-label, non-randomised, prospective, first-in-human phase 1 clinical trial. *Lancet* **2017**; *390*: 1511–1520.
- 4 Feldman RA, Fuhr R, Smolenov I, Mick Ribeiro A, Panther L, Watson M *et al*. mRNA vaccines against H10N8 and H7N9 influenza viruses of pandemic potential are immunogenic and well tolerated in healthy adults in phase 1 randomized clinical trials. *Vaccine* **2019**; *37*: 3326–3334.
- 5 Anderson EJ, Roupael NG, Widge AT, Jackson LA, Roberts PC, Makhene M *et al*. Safety and Immunogenicity of SARS-CoV-2 mRNA-1273 Vaccine in Older Adults. *N Engl J Med* **2020**; *383*: 2427–2438.
- 6 Walsh EE, Frenck RW, Falsey AR, Kitchin N, Absalon J, Gurtman A *et al*. Safety and Immunogenicity of Two RNA-Based Covid-19 Vaccine Candidates. *N Engl J Med* **2020**; *383*: 2439–2450.
- 7 Ura T, Yamashita A, Mizuki N, Okuda K, Shimada M. New vaccine production platforms used in developing SARS-CoV-2 vaccine candidates. *Vaccine* **2021**; *39*: 197–201.
- 8 Dai L, Gao GF. Viral targets for vaccines against COVID-19. *Nat Rev Immunol* **2021**; *21*: 73–82.
- 9 Lee WS, Wheatley AK, Kent SJ, DeKosky BJ. Antibody-dependent enhancement and SARS-CoV-2 vaccines and therapies. *Nat Microbiol* **2020**; *5*: 1185–1191.
- 10 Liang F, Lindgren G, Lin A, Thompson EA, Ols S, Röhss J *et al*. Efficient Targeting and Activation of Antigen-Presenting Cells In Vivo after Modified mRNA Vaccine Administration in Rhesus Macaques. *Mol Ther* **2017**; *25*: 2635–2647.
- 11 Zhu Z, Gao P, Hu Y, Wang J, Wang H, Yang J *et al*. PEGylated versus non-PEGylated drugs: A cross-sectional analysis of adverse events in the FDA Adverse Event Reporting System (FAERS) Database. *Int J Clin Pharmacol Ther* **2020**; *58*: 332–342.
- 12 Castells MC, Phillips EJ. Maintaining Safety with SARS-CoV-2 Vaccines. *New England Journal of Medicine* **2021**; *384*: 643–649.
- 13 Chen RE, Zhang X, Case JB, Winkler ES, Liu Y, VanBlargan LA *et al*. Resistance of SARS-CoV-2 variants to neutralization by monoclonal and serum-derived polyclonal antibodies. *Nature Medicine* **2021**; DOI: 10.1038/s41591-021-01294-w
- 14 McKinlay CJ, Vargas JR, Blake TR, Hardy JW, Kanada M, Contag CH *et al*. Charge-altering releasable transporters (CARTs) for the delivery and release of mRNA in living animals. *Proc Natl Acad Sci U S A* **2017**; *114*: E448–E456.
- 15 McKinlay CJ, Benner NL, Haabeth OA, Waymouth RM, Wender PA. Enhanced mRNA



- delivery into lymphocytes enabled by lipid-varied libraries of charge-altering releasable transporters. *Proc Natl Acad Sci U S A* **2018**; *115*: E5859–E5866.
- 16 Haabeth OAW, Blake TR, McKinlay CJ, Waymouth RM, Wender PA, Levy R. mRNA vaccination with charge-altering releasable transporters elicits human T cell responses and cures established tumors in mice. *Proc Natl Acad Sci U S A* **2018**; *115*: E9153–E9161.
  - 17 Bode C, Zhao G, Steinhagen F, Kinjo T, Klinman DM. CpG DNA as a vaccine adjuvant. *Expert Rev Vaccines* **2011**; *10*: 499–511.
  - 18 Amanat F, Krammer F. SARS-CoV-2 Vaccines: Status Report. *Immunity* **2020**; *52*: 583–589.
  - 19 Zhang N-N, Li X-F, Deng Y-Q, Zhao H, Huang Y-J, Yang G *et al.* A Thermostable mRNA Vaccine against COVID-19. *Cell* **2020**; *182*: 1271-1283.e16.
  - 20 Huang Q, Ji K, Tian S, Wang F, Huang B, Tong Z *et al.* A single-dose mRNA vaccine provides a long-term protection for hACE2 transgenic mice from SARS-CoV-2. *Nat Commun* **2021**; *12*. doi:10.1038/s41467-021-21037-2.
  - 21 Haabeth OAW, Blake TR, McKinlay CJ, Tveita AA, Sallets A, Waymouth RM *et al.* Local Delivery of Ox40l, Cd80, and Cd86 mRNA Kindles Global Anticancer Immunity. *Cancer Res* **2019**; *79*: 1624–1634.
  - 22 Xue HY, Liu S, Wong HL. Nanotoxicity: a key obstacle to clinical translation of siRNA-based nanomedicine. *Nanomedicine (Lond)* **2014**; *9*: 295–312.
  - 23 Amanat F, Stadlbauer D, Strohmeier S, Nguyen THO, Chromikova V, McMahon M *et al.* A serological assay to detect SARS-CoV-2 seroconversion in humans. *Nat Med* **2020**; *26*: 1033–1036.
  - 24 Vaidyanathan S, Azizian KT, Haque AKMA, Henderson JM, Hendel A, Shore S *et al.* Uridine Depletion and Chemical Modification Increase Cas9 mRNA Activity and Reduce Immunogenicity without HPLC Purification. *Mol Ther Nucleic Acids* **2018**; *12*: 530–542.
  - 25 Toellner K-M, Luther SA, Sze DM-Y, Choy RK-W, Taylor DR, MacLennan ICM *et al.* T Helper 1 (Th1) and Th2 Characteristics Start to Develop During T Cell Priming and Are Associated with an Immediate Ability to Induce Immunoglobulin Class Switching. *J Exp Med* **1998**; *187*: 1193–1204.
  - 26 Reinhardt RL, Liang H-E, Locksley RM. Cytokine-secreting follicular T cells shape the antibody repertoire. *Nat Immunol* **2009**; *10*: 385–393.
  - 27 Mulligan MJ, Lyke KE, Kitchin N, Absalon J, Gurtman A, Lockhart S *et al.* Phase I/II study of COVID-19 RNA vaccine BNT162b1 in adults. *Nature* **2020**; *586*: 589–593.
  - 28 Polack FP, Thomas SJ, Kitchin N, Absalon J, Gurtman A, Lockhart S *et al.* Safety and Efficacy of the BNT162b2 mRNA Covid-19 Vaccine. *N Engl J Med* **2020**; *383*: 2603–2615.
  - 29 Baden LR, El Sahly HM, Essink B, Kotloff K, Frey S, Novak R *et al.* Efficacy and Safety of the mRNA-1273 SARS-CoV-2 Vaccine. *N Engl J Med* **2021**; *384*: 403–416.
  - 30 Darrah PA, Zeppa JJ, Maiello P, Hackney JA, Wadsworth MH, Hughes TK *et al.* Prevention of tuberculosis in macaques after intravenous BCG immunization. *Nature* **2020**; *577*: 95–102.
  - 31 Grunwitz C, Salomon N, Vascotto F, Selmi A, Bukur T, Diken M *et al.* HPV16 RNA-LPX vaccine mediates complete regression of aggressively growing HPV-positive mouse tumors and establishes protective T cell memory. *Oncoimmunology* **2019**; *8*. doi:10.1080/2162402X.2019.1629259.
  - 32 Sahin U, Muik A, Derhovanessian E, Vogler I, Kranz LM, Vormehr M *et al.* COVID-19 vaccine BNT162b1 elicits human antibody and TH1 T cell responses. *Nature* **2020**; *586*: 594–599.



- 33 Piccoli L, Park Y-J, Tortorici MA, Czudnochowski N, Walls AC, Beltramello M *et al.* Mapping Neutralizing and Immunodominant Sites on the SARS-CoV-2 Spike Receptor-Binding Domain by Structure-Guided High-Resolution Serology. *Cell* **2020**; *183*: 1024–1042.e21.
- 34 Smith TRF, Patel A, Ramos S, Elwood D, Zhu X, Yan J *et al.* Immunogenicity of a DNA vaccine candidate for COVID-19. *Nat Commun* **2020**; *11*: 2601.
- 35 Gu H, Chen Q, Yang G, He L, Fan H, Deng Y-Q *et al.* Adaptation of SARS-CoV-2 in BALB/c mice for testing vaccine efficacy. *Science* **2020**; *369*: 1603–1607.
- 36 Garcia-Beltran WF, Lam EC, St. Denis K, Nitido AD, Garcia ZH, Hauser BM *et al.* Multiple SARS-CoV-2 variants escape neutralization by vaccine-induced humoral immunity. *Cell* **2021**. doi:10.1016/j.cell.2021.03.013.
- 37 Ballas ZK, Rasmussen WL, Krieg AM. Induction of NK activity in murine and human cells by CpG motifs in oligodeoxynucleotides and bacterial DNA. *J Immunol* **1996**; *157*: 1840–1845.
- 38 Klinman DM, Yi AK, Beaucage SL, Conover J, Krieg AM. CpG motifs present in bacteria DNA rapidly induce lymphocytes to secrete interleukin 6, interleukin 12, and interferon gamma. *Proc Natl Acad Sci U S A* **1996**; *93*: 2879–2883.
- 39 Sun S, Zhang X, Tough DF, Sprent J. Type I interferon-mediated stimulation of T cells by CpG DNA. *J Exp Med* **1998**; *188*: 2335–2342.
- 40 Stacey KJ, Sweet MJ, Hume DA. Macrophages ingest and are activated by bacterial DNA. *J Immunol* **1996**; *157*: 2116–2122.
- 41 Krieg AM, Yi AK, Matson S, Waldschmidt TJ, Bishop GA, Teasdale R *et al.* CpG motifs in bacterial DNA trigger direct B-cell activation. *Nature* **1995**; *374*: 546–549.
- 42 Davis HL, Weeratna R, Waldschmidt TJ, Tygrett L, Schorr J, Krieg AM *et al.* CpG DNA is a potent enhancer of specific immunity in mice immunized with recombinant hepatitis B surface antigen. *J Immunol* **1998**; *160*: 870–876.
- 43 Kobayashi H, Horner AA, Takabayashi K, Nguyen MD, Huang E, Cinman N *et al.* Immunostimulatory DNA pre-priming: a novel approach for prolonged Th1-biased immunity. *Cell Immunol* **1999**; *198*: 69–75.
- 44 Jung J, Yi A-K, Zhang X, Choe J, Li L, Choi YS. Distinct response of human B cell subpopulations in recognition of an innate immune signal, CpG DNA. *J Immunol* **2002**; *169*: 2368–2373.
- 45 Crawford KHD, Eguia R, Dingens AS, Loes AN, Malone KD, Wolf CR *et al.* Protocol and Reagents for Pseudotyping Lentiviral Particles with SARS-CoV-2 Spike Protein for Neutralization Assays. *Viruses* **2020**; *12*: 513.
- 46 Rogers TF, Zhao F, Huang D, Beutler N, Burns A, He W *et al.* Isolation of potent SARS-CoV-2 neutralizing antibodies and protection from disease in a small animal model. *Science* **2020**; *369*: 956–963.
- 47 Sun F, Xiao G, Qu Z. Murine Bronchoalveolar Lavage. *Bio Protoc* **2017**; *7*. doi:10.21769/BioProtoc.2287.
